# Supplementary material for: Growth, Physiological, Nutrient-Uptake-Efficiency and Shade-Tolerance Responses of Cacao Genotypes under Different Shades
Source: MDPI journal article supplement (doi:10.3390/agronomy11081536), 2021-07-30
Supplement: s1 [file s1]

## SUPPLEMENTARY INFORMATION

### Growth, physiological, nutrient-uptake-efficiency and shade-tolerance responses of cacao genotypes under different shades

Enrique Arévalo-Gardini<sup>1,2\*</sup>, Abel Farfán<sup>a</sup>, Fiorella Barraza<sup>1,3</sup>, César O. Arévalo-Hernández<sup>1</sup>, Luis B. Zuñiga-Cernades<sup>1</sup>, Julio Alegre<sup>4</sup>, Virupax C. Baligar<sup>5</sup>

<sup>1</sup> Instituto de Cultivos Tropicales (ICT), Tarapoto, 22200, Peru; abelfarp29@gmail.com (A.F.); barrazac@ualberta.ca (F.B.); cesar.arevaloh@gmail.com (C.O.A.-H.); luiszunigac53@gmail.com (L.B.Z.-C.)

<sup>2</sup> Agronomy Faculty, Universidad Nacional Autonoma de Alto Amazonas (UNAAA), Yurimaguas, 16501, Peru

<sup>3</sup> Department of Renewable Resources, University of Alberta, Edmonton, AB, T6G 2G7, Canada

<sup>4</sup> Agronomy Faculty, Universidad Nacional Agraria La Molina (UNALM), Lima, 15026, Peru; jalegre@lamolina.edu.pe

<sup>5</sup> U.S. Department of Agriculture/Agricultural Research Service, Beltsville Agricultural Research Center, Beltsville, MD 20705, USA; v.c.baligar@usda.gov

\* Correspondence: author: enriquearevaloga@gmail.com

**Table S1.** Growth parameters (mean values per plant) of cacao genotypes from different origins subjected to two levels of shade (50% and 80%).

| Genotype       |    | SL (cm)*   |           | SD (mm)   |          | LA (cm <sup>2</sup> ) |             | RA (cm <sup>2</sup> ) |            | RDW (g)   |          | BDW (g)   |           | S/R      |          |
|----------------|----|------------|-----------|-----------|----------|-----------------------|-------------|-----------------------|------------|-----------|----------|-----------|-----------|----------|----------|
|                |    | 50%        | 80%       | 50%       | 80%      | 50%                   | 80%         | 50%                   | 80%        | 50%       | 80%      | 50%       | 80%       | 50%      | 80%      |
| PWC            |    |            |           |           |          |                       |             |                       |            |           |          |           |           |          |          |
| AYP-15         |    | 33.33 c**  | 45.27 b   | 10.72 b   | 8.19 d   | 706.92 b              | 860.25 b    | 239.83 d              | 208.15 d   | 3.75 e    | 1.14 e   | 25.49 d   | 11.91 g   | 6.22 b   | 9.41 a   |
| AYP-20         |    | 38.27 c    | 51.27 b   | 10.84 b   | 8.90 c   | 388.71 b              | 701.45 b    | 108.34 d              | 151.63 d   | 6.13 d    | 2.64 e   | 30.97 c   | 16.03 f   | 4.07 c   | 5.25 b   |
| AYP-22         |    | 37.50 c    | 48.77 b   | 8.94 c    | 7.88 d   | 1245.41 a             | 1032.92 a   | 306.99 c              | 325.15 c   | 5.06 d    | 1.94 e   | 26.02 d   | 6.63 g    | 4.39 b   | 2.47 d   |
| PAS-100        |    | 27.67 c    | 36.80 c   | 9.91 c    | 7.49 d   | 845.88 b              | 959.96 b    | 190.21 d              | 222.01 d   | 5.72 d    | 1.93 e   | 29.19 d   | 13.37 g   | 4.48 b   | 5.96 b   |
| PAS-105        |    | 32.67 c    | 36.13 c   | 9.57 c    | 8.07 d   | 596.09 b              | 937.02 b    | 300.61 c              | 388.76 b   | 4.97 d    | 1.40 e   | 28.44 d   | 9.57 g    | 4.74 b   | 5.97 b   |
| PAS-91         |    | 31.63 c    | 46.90 b   | 11.84 a   | 8.05 d   | 1173.48 a             | 1228.88 a   | 290.09 c              | 433.64 a   | 10.71 b   | 2.72 e   | 42.38 a   | 13.33 g   | 3.07 d   | 4.19 c   |
| PAS-93         |    | 43.37 c    | 59.97 a   | 11.38 b   | 8.39 d   | 722.72 b              | 1045.25 a   | 197.86 d              | 315.98 c   | 9.17 c    | 2.22 e   | 28.71 d   | 12.68 g   | 2.18 d   | 4.71 b   |
| UGU-112        |    | 31.43 c    | 44.37 b   | 10.08 c   | 7.75 d   | 531.56 b              | 838.70 b    | 239.69 d              | 337.40 b   | 6.92 c    | 1.31 e   | 29.12 d   | 9.78 g    | 3.93 c   | 6.57 b   |
| UGU-126        |    | 30.57 c    | 41.03 c   | 10.97 b   | 7.67 d   | 733.08 b              | 1057.4 a    | 210.60 d              | 281.22 c   | 5.91 d    | 1.41 e   | 32.25 c   | 14.17 g   | 4.71 b   | 9.18 a   |
| UGU-130        |    | 23.37 c    | 35.77 c   | 8.64 d    | 6.45 d   | 666.84 b              | 1152.7 a    | 214.62 d              | 209.03 d   | 3.57 e    | 1.64 e   | 21.34 e   | 13.19 g   | 5.19 b   | 7.34 a   |
| UNG-53         |    | 35.60 c    | 42.87 c   | 9.09 c    | 7.64 d   | 990.34 b              | 1040.46 a   | 251.17 c              | 361.67 b   | 6.46 c    | 2.65 e   | 26.13 d   | 11.37 g   | 3.04 d   | 3.27 c   |
| UNG-73         |    | 31.83 c    | 45.07 b   | 10.63 b   | 7.24 d   | 658.56 b              | 1235.49 a   | 324.58 c              | 365.62 b   | 9.76 b    | 3.30 e   | 39.59 a   | 18.07 f   | 3.16 c   | 4.75 b   |
| UNG-76         |    | 36.60 c    | 49.33 b   | 10.39 b   | 7.10 d   | 559.94 b              | 944.88 b    | 192.31 d              | 352.97 d   | 9.15 c    | 3.37 e   | 39.42 a   | 21.75 e   | 3.42 c   | 5.48 b   |
| UNG-77         |    | 36.90 c    | 40.87 c   | 9.39 c    | 9.55 c   | 1108.74 a             | 1300.43 a   | 314.03 c              | 190.42 b   | 9.93 b    | 5.67 d   | 32.28 c   | 21.70 e   | 2.32 d   | 2.83 d   |
| PFC            |    |            |           |           |          |                       |             |                       |            |           |          |           |           |          |          |
| ICT-1026       |    | 45.00 b    | 50.73 b   | 12.43 a   | 9.03 c   | 749.85 b              | 1246.95 a   | 261.78 c              | 376.03 b   | 10.41 b   | 2.50 e   | 36.27 b   | 11.78 g   | 2.59 d   | 4.49 b   |
| ICT-1087       |    | 45.87 b    | 51.83 b   | 12.63 a   | 10.30 b  | 904.52 b              | 1102.92 a   | 295.09 c              | 496.99 a   | 10.04 b   | 5.59 d   | 41.94 a   | 26.77 d   | 3.22 c   | 3.87 c   |
| ICT-1092       |    | 35.40 c    | 68.47 a   | 13.00 a   | 9.06 c   | 1040.10 a             | 1202.26 a   | 287.74 c              | 373.28 b   | 9.03 c    | 2.78 e   | 40.35 a   | 17.19 f   | 3.65 c   | 5.29 b   |
| ICT-1112       |    | 42.27 c    | 55.10 a   | 12.03 a   | 7.88 d   | 985.50 b              | 1392.01 a   | 342.00 b              | 391.44 b   | 12.65 a   | 5.37 d   | 40.01 a   | 20.91 e   | 2.16 d   | 2.89 d   |
| ICT-1189       |    | 38.93 c    | 50.67 b   | 12.90 a   | 10.04 c  | 1207.02 a             | 1253.8 a    | 292.81 c              | 341.51 b   | 12.64 a   | 4.31 d   | 40.61 a   | 20.04 e   | 2.22 d   | 3.65 c   |
| ICT-1251       |    | 38.53 c    | 51.60 b   | 11.47 b   | 9.72 c   | 812.41 b              | 1162.32 a   | 346.18 b              | 416.42 a   | 9.14 c    | 3.20 e   | 33.01 c   | 16.04 f   | 2.62 d   | 4.09 c   |
| ICT-1281       |    | 36.93 c    | 37.27 c   | 11.02 b   | 8.22 d   | 656.73 b              | 1221.94 a   | 360.48 b              | 379.81 b   | 9.78 b    | 2.59 e   | 34.20 b   | 16.46 f   | 2.54 d   | 5.72 b   |
| ICT-1292       |    | 43.03 c    | 54.90 a   | 13.15 a   | 9.02 c   | 968.91 b              | 1057.95 a   | 293.15 c              | 371.26 b   | 12.05 a   | 3.96 e   | 37.69 b   | 15.65 g   | 2.16 d   | 3.03 d   |
| ICT-1506       |    | 38.97 c    | 49.00 b   | 11.42 b   | 10.88 b  | 776.12 b              | 1038.42 a   | 304.42 c              | 460.27 a   | 9.42 b    | 3.67 e   | 31.95 c   | 21.17 e   | 2.48 d   | 4.77 b   |
| ICT-2142       |    | 34.90 c    | 46.20 b   | 11.20 b   | 9.26 c   | 776.68 b              | 822.84 b    | 322.66 c              | 449.18 a   | 10.17 b   | 3.37 e   | 28.95 d   | 19.44 e   | 1.87 d   | 4.89 b   |
| ICT-2161       |    | 35.00 c    | 46.10 b   | 11.78 a   | 10.13 c  | 616.93 b              | 983.81 b    | 257.92 c              | 472.67 a   | 10.04 b   | 3.60 e   | 32.34 c   | 16.35 f   | 2.22 d   | 3.88 c   |
| ICT-2171       |    | 41.53 c    | 55.10 a   | 13.27 a   | 8.58 d   | 881.30 b              | 999.13 a    | 285.55 c              | 336.09 b   | 12.46 a   | 5.54 d   | 35.91 b   | 22.19 e   | 1.89 d   | 3.00 d   |
| ICT-2172       |    | 37.60 c    | 65.43 a   | 13.65 a   | 8.70 d   | 1437.02 a             | 1412.61 a   | 249.74 c              | 307.74 c   | 12.27 a   | 4.64 d   | 34.35 b   | 22.83 e   | 1.80 d   | 3.92 c   |
| ICT-2173       |    | 47.40 b    | 48.93 b   | 10.27 b   | 8.49 d   | 785.07 b              | 1255.67 a   | 277.44 c              | 349.77 b   | 7.54 c    | 4.18 d   | 28.69 d   | 21.09 e   | 2.98 d   | 4.04 c   |
| ICT-2653       |    | 32.10 c    | 47.23 b   | 11.93 a   | 9.76 c   | 879.42 b              | 1035.99 a   | 337.94 b              | 307.94 c   | 11.57 a   | 3.67 e   | 37.41 b   | 13.43 g   | 2.24 d   | 2.67 d   |
| BCC            |    |            |           |           |          |                       |             |                       |            |           |          |           |           |          |          |
| BN-34          |    | 37.70 c    | 35.57 c   | 8.54 d    | 6.65 d   | 763.10 b              | 1058.05 a   | 334.53 b              | 340.96 b   | 9.25 c    | 3.63 e   | 32.60 c   | 16.18 f   | 2.53 d   | 3.49 c   |
| BS-01          |    | 34.50 c    | 41.73 c   | 8.72 d    | 9.83 c   | 879.54 b              | 1079.15 a   | 338.36 b              | 402.63 a   | 7.60 c    | 3.38 e   | 31.68 c   | 15.64 g   | 3.29 c   | 3.63 c   |
| CA-14          |    | 36.73 c    | 33.07 c   | 9.65 c    | 7.66 d   | 818.76 b              | 834.93 b    | 272.47 c              | 361.36 b   | 6.47 c    | 2.49 e   | 26.66 d   | 17.44 f   | 3.43 c   | 6.07 b   |
| CEPEC-2002     |    | 36.20 c    | 40.43 c   | 10.72 b   | 8.25 d   | 632.53 b              | 970.48 b    | 302.44 c              | 288.82 c   | 7.95 c    | 3.27 e   | 29.00 d   | 10.96 g   | 2.60 d   | 2.31 d   |
| CP-49-C10      |    | 36.27 c    | 35.23 c   | 10.52 b   | 7.58 d   | 763.34 b              | 1118.17 a   | 332.71 b              | 390.72 b   | 7.69 c    | 3.00 e   | 34.63 b   | 12.96 g   | 3.51 c   | 3.37 c   |
| CP-53-C10      |    | 31.40 c    | 37.13 c   | 9.79 c    | 7.62 d   | 812.02 b              | 950.53 b    | 290.11 c              | 343.77 b   | 7.25 c    | 2.62 e   | 32.38 c   | 11.66 g   | 3.64 c   | 3.60 c   |
| IPIRANGA-1     |    | 31.73 c    | 56.00 a   | 10.05 c   | 7.93 d   | 1117.13 a             | 1166.97 a   | 340.01 b              | 345.07 b   | 7.41 c    | 2.87 e   | 30.37 c   | 10.88 g   | 3.62 c   | 3.71 c   |
| PH-09          |    | 23.07 c    | 46.63 b   | 9.92 c    | 8.33 d   | 687.77 b              | 1002.07 a   | 307.15 c              | 270.79 c   | 8.20 c    | 1.30 e   | 33.86 b   | 9.39 g    | 3.19 c   | 6.54 b   |
| PH-144         |    | 45.33 b    | 54.07 a   | 11.99 a   | 9.63 c   | 977.80 b              | 1016.84 a   | 252.06 c              | 343.32 b   | 7.66 c    | 3.03 e   | 34.97 b   | 21.61 e   | 3.59 c   | 6.19 b   |
| PH-15          |    | 34.73 c    | 51.40 b   | 9.79 c    | 8.56 d   | 872.39 b              | 969.05 b    | 439.71 a              | 450.62 a   | 5.22 d    | 2.55 e   | 25.58 d   | 13.40 g   | 4.01 c   | 4.33 b   |
| PH-16          |    | 29.53 c    | 34.07 c   | 9.62 c    | 7.53 d   | 817.56 b              | 980.65 b    | 368.82 b              | 371.42 b   | 9.13 c    | 3.21 e   | 29.15 d   | 14.06 g   | 2.29 d   | 3.36 c   |
| PH-17          |    | 31.20 c    | 35.57 c   | 9.09 c    | 7.16 d   | 801.06 b              | 1115.94 a   | 251.80 c              | 257.28 c   | 7.50 c    | 3.52 e   | 25.56 d   | 12.82 g   | 2.48 d   | 2.65 d   |
| PH-21          |    | 39.97 c    | 53.20 a   | 9.34 c    | 8.27 d   | 791.30 b              | 1077.63 a   | 302.73 c              | 221.90 d   | 4.24 d    | 3.06 e   | 26.84 d   | 17.85 f   | 5.33 b   | 4.87 b   |
| PH-990         |    | 35.47 c    | 40.30 c   | 9.41 c    | 7.83 d   | 943.25 b              | 1185.36 a   | 318.69 c              | 332.32 b   | 5.43 d    | 2.99 e   | 27.45 d   | 17.21 f   | 4.73 b   | 5.09 b   |
| NIC            |    |            |           |           |          |                       |             |                       |            |           |          |           |           |          |          |
| CCN-10         |    | 31.27 c    | 41.33 c   | 13.43 a   | 10.48 b  | 1024.44 a             | 1184.12 a   | 298.51 c              | 442.30 a   | 11.02 a   | 3.63 e   | 34.39 b   | 17.13 f   | 2.14 d   | 3.77 c   |
| CCN-51         |    | 40.10 c    | 45.33 b   | 12.06 a   | 10.56 b  | 1294.43 a             | 1393.24 a   | 404.42 a              | 494.13 a   | 11.30 a   | 5.70 d   | 40.18 a   | 22.28 e   | 2.61 d   | 2.91 d   |
| EET-400        |    | 39.27 c    | 50.03 b   | 10.93 b   | 8.55 d   | 965.54 b              | 988.93 b    | 240.07 d              | 308.90 c   | 9.76 b    | 3.07 e   | 32.60 c   | 17.21 f   | 2.38 d   | 4.69 b   |
| H-10           |    | 50.05 b    | 63.10 a   | 12.26 a   | 8.05 d   | 720.73 b              | 1335.75 a   | 474.94 a              | 372.16 b   | 8.15 c    | 3.81 e   | 27.16 d   | 13.09 g   | 2.31 d   | 2.52 d   |
| ICS-1          |    | 41.30 c    | 42.93 c   | 12.14 a   | 9.32 c   | 917.33 b              | 1140.95 a   | 272.13 c              | 407.49 a   | 8.67 c    | 4.18 d   | 29.37 d   | 22.22 e   | 2.38 d   | 4.35 b   |
| ICS-39         |    | 41.47 c    | 53.90 a   | 12.40 a   | 8.53 d   | 816.56 b              | 1054.92 a   | 305.41 c              | 372.95 b   | 7.33 c    | 3.34 e   | 32.80 c   | 20.93 e   | 3.53 c   | 5.63 b   |
| ICS-6          |    | 36.40 c    | 45.57 b   | 12.14 a   | 8.21 d   | 801.38 b              | 914.53 b    | 328.02 c              | 453.16 a   | 7.56 c    | 3.91 e   | 29.79 d   | 15.83 g   | 2.96 d   | 3.06 d   |
| ICS-95         |    | 44.80 b    | 37.93 c   | 11.03 b   | 8.32 d   | 967.35 b              | 1182.73 a   | 284.28 c              | 345.16 b   | 8.20 c    | 2.63 e   | 31.51 c   | 15.46 g   | 2.86 d   | 5.09 b   |
| IMC-67         |    | 42.27 c    | 44.83 b   | 13.49 a   | 8.78 c   | 1022.91 a             | 1281.34 a   | 364.60 b              | 472.07 a   | 11.37 a   | 3.07 e   | 33.77 b   | 14.30 g   | 2.07 d   | 3.75 c   |
| POUND-12       |    | 42.07 c    | 45.97 b   | 12.00 a   | 9.55 c   | 1038.90 a             | 1117.07 a   | 341.77 b              | 452.85 a   | 7.03 c    | 3.80 e   | 28.47 d   | 17.28 f   | 3.07 d   | 3.56 c   |
| SCA-6          |    | 35.77 c    | 39.83 c   | 11.01 b   | 10.22 b  | 943.69 b              | 1315.00 a   | 269.91 c              | 412.50 a   | 7.27 c    | 2.80 e   | 28.18 d   | 13.68 g   | 2.98 d   | 4.15 c   |
| TSH-1188       |    | 35.83 c    | 44.40 b   | 12.36 a   | 8.74 c   | 737.38 b              | 1054.80 a   | 345.92 b              | 430.10 a   | 10.29 b   | 3.49 e   | 32.50 c   | 17.62 f   | 2.19 d   | 4.10 c   |
| TSH-565        |    | 33.77 c    | 42.07 c   | 11.86 a   | 9.17 c   | 902.88 b              | 1262.33 a   | 289.53 c              | 433.21 a   | 9.52 b    | 3.00 e   | 35.75 b   | 12.18 g   | 2.75 d   | 4.10 c   |
| UF-613         |    | 33.27 c    | 38.87 c   | 11.79 a   | 8.36 d   | 815.09 b              | 1070.66 a   | 303.36 c              | 442.48 a   | 7.51 c    | 3.77 e   | 28.87 d   | 18.53 f   | 2.85 d   | 3.95 c   |
| UF-667         |    | 38.17 c    | 43.33 c   | 11.63 b   | 8.63 d   | 1319.35 a             | 1527.33 a   | 395.79 b              | 434.70 a   | 10.39 b   | 3.80 e   | 35.91 b   | 19.70 e   | 2.52 d   | 4.21 c   |
| Media PWC      |    | 33.62 (d)  | 44.60 (b) | 10.17 (b) | 7.88 (d) | 780.59 (d)            | 1023.99 (b) | 241.50 (d)            | 295.97 (c) | 6.94 (c)  | 2.38 (e) | 30.81 (b) | 13.83 (d) | 3.92 (b) | 5.53 (a) |
| Media BCC      |    | 39.56 (c)  | 51.90 (a) | 12.14 (a) | 9.27 (c) | 898.51 (c)            | 1145.91 (a) | 300.99 (c)            | 388.69 (c) | 10.61 (a) | 2.93 (d) | 35.58 (a) | 18.76 (c) | 2.44 (d) | 4.01 (b) |
| Media PFC      |    | 34.56 (d)  | 42.46 (b) | 9.80 (b)  | 8.06 (d) | 834.11 (d)            | 1037.56 (b) | 317.97 (b)            | 337.21 (b) | 7.21 (c)  | 2.92 (e) | 30.05 (b) | 14.43 (d) | 3.45 (c) | 4.23 (b) |
| Media NIC      |    | 39.05 (c)  | 45.30 (b) | 12.04 (a) | 9.03 (c) | 952.53 (c)            | 1188.25 (a) | 327.91 (b)            | 418.28 (a) | 9.02 (b)  | 3.60 (d) | 32.08 (b) | 17.16 (c) | 2.64 (d) | 3.99 (b) |
| Media Total    |    | 36.79 B*** | 46.15 A   | 11.07 A   | 8.58 B   | 868.47 B              | 1110.27 A   | 297.69 B              | 361.54 A   | 8.50 A    | 3.23 B   | 32.19 A   | 16.11 B   | 3.09 B   | 4.42 A   |
| Source of      |    |            |           |           |          |                       |             |                       |            |           |          |           |           |          |          |
| P <sub>v</sub> |    |            |           |           |          |                       |             |                       |            |           |          |           |           |          |          |
| Shade (S)      | 1  | 0.0004     |           | 0.0001    |          | 0.0001                |             | <0.0001               |            | <0.0001   |          | <0.0001   |           | 0.0001   |          |
| Genotype (G)   | 57 | <0.0001    |           | <0.0001   |          | <0.0001               |             | <0.0001               |            | <0.0001   |          | <0.0001   |           | <0.0001  |          |
| G*S            | 57 | 0.0072     |           | 0.0003    |          | 0.6657                |             | 0.0008                |            | <0.0001   |          | <0.0001   |           | 0.0006   |          |

(\*) SL: shoot length, SD: stem diameter, LA: leaf area, RA: root area, RDW: root dry weight, BDW: total dry weight, S/R: shoot/root rate. (\*\*) Average of three replicates; different lower case letters on the right of each value in both columns of each variable indicate a significant difference between genotypes and shade level, (Scott & Knott test,  $P \leq 0.05$ ). (\*\*\*) Average of 58 genotypes; different capital letters on the right of each value in line of each variable indicate a significant difference between shade level (Scott & Knott test,  $P \leq 0.05$ ). PWC: wild cacao from river basins of Peruvian Amazon collection (n=14), PFC: Peruvian farmers' collection (n=15), BCC: Brazilian cacao collection (n=14), NIC: national and international cacao collection (n=15). Different lower case letters in parenthesis on the right of each value in both columns of each variable indicate a significant difference between genotypes and shade level, (Scott & Knott test,  $P \leq 0.05$ ).

**Table S2.** Physiological parameters (mean values)- and Shade Tolerance Index (STI) for 58 cacao genotypes subjected to two levels of shade (50 and 80%).

| Genotype     | CHL (SPAD)* |           | gs (mmol m <sup>-2</sup> s <sup>-1</sup> ) |            | WUE (g l <sup>-1</sup> ) |          | STI       |
|--------------|-------------|-----------|--------------------------------------------|------------|--------------------------|----------|-----------|
|              | 50%         | 80%       | 50%                                        | 80%        | 50%                      | 80%      |           |
| <b>PWC</b>   |             |           |                                            |            |                          |          |           |
| AYP-15       | 33.10 b**   | 34.50 a   | 245.10 a                                   | 51.54 b    | 1.21 b                   | 0.92 c   | 47.06 c   |
| AYP-20       | 33.30 b     | 33.93 a   | 179.10 b                                   | 54.47 b    | 1.38 b                   | 1.14 b   | 51.78 c   |
| AYP-22       | 33.03 b     | 33.97 a   | 226.13 a                                   | 81.30 b    | 1.16 b                   | 0.40 d   | 25.72 d   |
| PAS-100      | 33.80 a     | 33.43 b   | 237.53 a                                   | 84.63 b    | 1.30 b                   | 0.98 c   | 46.51 c   |
| PAS-105      | 33.33 b     | 33.70 b   | 125.13 b                                   | 78.10 b    | 1.30 b                   | 0.70 d   | 33.54 d   |
| PAS-91       | 34.63 a     | 33.20 b   | 107.23 b                                   | 58.20 b    | 1.76 a                   | 0.91 c   | 30.28 d   |
| PAS-93       | 34.60 a     | 33.20 b   | 151.80 b                                   | 102.20 b   | 1.09 c                   | 0.89 c   | 28.43 d   |
| UGU-112      | 33.57 b     | 33.40 b   | 104.57 b                                   | 49.73 b    | 1.23 b                   | 0.72 d   | 34.07 d   |
| UGU-126      | 33.57 b     | 33.20 b   | 142.63 b                                   | 47.33 b    | 1.46 a                   | 1.09 c   | 44.67 c   |
| UGU-130      | 34.70 a     | 33.47 b   | 127.03 b                                   | 62.30 b    | 0.99 c                   | 0.99 c   | 61.65 b   |
| UNG-53       | 32.90 b     | 34.07 a   | 259.70 a                                   | 84.37 b    | 1.09 c                   | 0.75 d   | 43.35 c   |
| UNG-73       | 34.43 a     | 33.23 b   | 140.33 b                                   | 73.70 b    | 1.66 a                   | 1.26 b   | 44.46 c   |
| UNG-76       | 34.30 a     | 33.47 b   | 261.33 a                                   | 97.00 b    | 1.68 a                   | 1.57 a   | 50.53 c   |
| UNG-77       | 33.07 b     | 33.00 b   | 329.97 a                                   | 62.97 b    | 1.24 b                   | 1.37 b   | 68.64 b   |
| <b>PFC</b>   |             |           |                                            |            |                          |          |           |
| ICT-1026     | 27.80 g     | 31.07 d   | 218.80 a                                   | 166.33 b   | 1.44 a                   | 0.79 d   | 31.30 d   |
| ICT-1087     | 29.10 e     | 30.40 d   | 159.23 b                                   | 122.47 b   | 1.77 a                   | 1.81 a   | 72.79 a   |
| ICT-1092     | 28.33 f     | 30.40 d   | 189.17 a                                   | 158.63 b   | 1.74 a                   | 1.23 b   | 42.29 c   |
| ICT-1112     | 27.40 g     | 30.50 d   | 229.80 a                                   | 150.93 b   | 1.52 a                   | 1.33 b   | 52.41 c   |
| ICT-1189     | 28.57 f     | 30.17 d   | 249.50 a                                   | 181.60 a   | 1.55 a                   | 1.34 b   | 50.74 c   |
| ICT-1251     | 29.23 e     | 28.97 f   | 146.67 b                                   | 173.77 b   | 1.33 b                   | 1.10 c   | 48.59 c   |
| ICT-1281     | 30.47 d     | 29.93 e   | 210.97 a                                   | 142.67 b   | 1.36 b                   | 1.19 b   | 48.52 c   |
| ICT-1292     | 28.63 f     | 31.37 d   | 131.80 b                                   | 166.83 b   | 1.42 a                   | 1.00 c   | 41.60 c   |
| ICT-1506     | 24.60 h     | 31.60 c   | 145.83 b                                   | 210.20 a   | 1.25 b                   | 1.50 a   | 61.18 b   |
| ICT-2142     | 33.03 b     | 31.67 c   | 131.73 b                                   | 190.40 a   | 1.04 c                   | 1.37 b   | 67.97 b   |
| ICT-2161     | 30.13 d     | 29.50 e   | 280.97 a                                   | 168.87 b   | 1.24 b                   | 1.09 c   | 51.18 c   |
| ICT-2171     | 28.57 f     | 30.30 d   | 146.77 b                                   | 150.17 b   | 1.30 b                   | 1.42 a   | 61.58 b   |
| ICT-2172     | 29.27 e     | 29.90 e   | 148.67 b                                   | 108.50 b   | 1.23 b                   | 1.55 a   | 82.18 a   |
| ICT-2173     | 32.60 c     | 31.53 c   | 109.47 b                                   | 217.90 a   | 1.18 b                   | 1.44 a   | 73.90 a   |
| ICT-2653     | 27.80 g     | 31.07 d   | 260.83 a                                   | 231.83 a   | 1.44 a                   | 0.83 d   | 35.56 d   |
| <b>BCC</b>   |             |           |                                            |            |                          |          |           |
| BN-34        | 29.80 e     | 29.27 e   | 208.97 a                                   | 85.20 b    | 1.30 b                   | 1.07 c   | 50.21 c   |
| BS-01        | 30.90 d     | 33.53 b   | 274.73 a                                   | 88.37 b    | 1.34 b                   | 1.05 c   | 49.98 c   |
| CA-14        | 33.07 b     | 34.50 a   | 264.50 a                                   | 147.93 b   | 1.12 c                   | 1.28 b   | 65.56 b   |
| CEPEC-2002   | 30.43 d     | 32.50 c   | 157.37 b                                   | 123.17 b   | 1.17 b                   | 0.66 d   | 37.92 d   |
| CP-49-C10    | 30.47 d     | 31.70 c   | 241.07 a                                   | 164.60 b   | 1.50 a                   | 0.85 d   | 37.46 d   |
| CP-53-C10    | 32.97 b     | 33.67 b   | 212.03 a                                   | 71.43 b    | 1.40 a                   | 0.77 d   | 36.00 d   |
| IPIRANGA-1   | 32.33 c     | 33.77 a   | 119.83 b                                   | 73.30 b    | 1.28 b                   | 0.68 d   | 36.04 d   |
| PH-09        | 32.73 c     | 33.57 b   | 198.03 a                                   | 183.27 a   | 1.43 a                   | 0.69 d   | 24.41 d   |
| PH-144       | 30.67 d     | 31.37 d   | 139.57 b                                   | 94.80 b    | 1.52 a                   | 1.59 a   | 61.72 b   |
| PH-15        | 30.63 d     | 33.57 b   | 225.30 a                                   | 145.40 b   | 1.13 c                   | 0.93 c   | 51.37 c   |
| PH-16        | 33.20 b     | 34.47 a   | 240.67 a                                   | 175.93 b   | 1.11 c                   | 0.93 c   | 46.80 c   |
| PH-17        | 30.47 d     | 33.83 a   | 256.60 a                                   | 149.37 b   | 1.00 c                   | 0.79 d   | 48.12 c   |
| PH-21        | 31.00 d     | 34.05 a   | 363.03 a                                   | 47.83 b    | 1.26 b                   | 1.26 b   | 65.62 b   |
| PH-990       | 32.93 b     | 33.97 a   | 274.30 a                                   | 60.00 b    | 1.22 b                   | 1.22 b   | 71.27 a   |
| <b>NIC</b>   |             |           |                                            |            |                          |          |           |
| CCN-10       | 32.13 c     | 34.00 a   | 144.27 b                                   | 82.25 b    | 1.30 b                   | 1.15 b   | 50.05 c   |
| CCN-51       | 30.53 d     | 30.87 d   | 158.07 b                                   | 76.37 b    | 1.60 a                   | 1.42 a   | 55.69 c   |
| EET-400      | 28.30 f     | 31.00 d   | 258.13 a                                   | 149.07 b   | 1.27 b                   | 1.21 b   | 52.62 c   |
| H-10         | 28.60 f     | 30.47 d   | 175.93 b                                   | 260.67 a   | 1.06 c                   | 0.79 d   | 49.20 c   |
| ICS-1        | 30.40 d     | 30.73 d   | 152.13 b                                   | 127.57 b   | 1.15 b                   | 1.54 a   | 74.90 a   |
| ICS-39       | 25.53 h     | 31.70 c   | 169.50 b                                   | 128.53 b   | 1.42 a                   | 1.50 a   | 73.86 a   |
| ICS-6        | 27.10 g     | 31.90 c   | 239.43 a                                   | 237.60 a   | 1.24 b                   | 1.02 c   | 53.26 c   |
| ICS-95       | 27.87 g     | 31.43 d   | 141.77 b                                   | 150.70 b   | 1.29 b                   | 1.10 c   | 50.72 c   |
| IMC-67       | 28.30 f     | 32.23 c   | 279.97 a                                   | 157.17 b   | 1.24 b                   | 0.96 c   | 36.80 d   |
| POUND-12     | 30.47 d     | 30.47 d   | 154.17 b                                   | 126.43 b   | 1.19 b                   | 1.15 b   | 60.83 b   |
| SCA-6        | 30.70 d     | 31.07 d   | 192.17 a                                   | 91.90 b    | 1.16 b                   | 0.93 c   | 49.20 c   |
| TSH-1188     | 30.60 d     | 30.80 d   | 169.40 b                                   | 118.90 b   | 1.23 b                   | 1.21 b   | 54.26 c   |
| TSH-565      | 28.00 g     | 31.07 d   | 115.60 b                                   | 94.77 b    | 1.46 a                   | 0.78 d   | 33.62 d   |
| UF-613       | 27.70 g     | 31.77 c   | 219.07 a                                   | 148.43 b   | 1.19 b                   | 1.26 b   | 79.71 a   |
| UF-667       | 30.50 d     | 31.10 d   | 187.13 a                                   | 146.67 b   | 1.42 a                   | 1.36 b   | 54.87 c   |
| Media PWC    | 33.74 (a)   | 33.55 (a) | 188.40 (b)                                 | 70.56 (d)  | 1.33 (a)                 | 0.98 (c) | 43.62 (c) |
| Media PFC    | 29.17 (e)   | 30.44 (d) | 184.01 (b)                                 | 169.41 (b) | 1.39 (a)                 | 1.27 (a) | 54.77 (a) |
| Media BCC    | 31.71 (b)   | 33.46 (a) | 226.86 (a)                                 | 115.04 (c) | 1.27 (a)                 | 0.98 (c) | 48.75 (b) |
| Media NIC    | 28.66 (e)   | 31.19 (c) | 183.78 (b)                                 | 139.80 (c) | 1.28 (a)                 | 1.16 (b) | 55.31 (a) |
| Media Total  | 30.75 B***  | 32.12 A   | 195.35 A                                   | 124.77 B   | 1.31 A                   | 1.09 B   | 50.77     |
| S. variation | df          | Pv        |                                            |            |                          |          |           |
| Shade (S)    | 1           | <0.0001   |                                            | 0.0001     |                          | 0.0003   |           |
| Genotype (G) | 57          | <0.0001   |                                            | 0.0002     |                          | <0.0001  |           |
| G*S          | 57          | <0.0001   |                                            | 0.0007     |                          | <0.0001  |           |

(\*)CHL: leaf chlorophyll content, gs: stomatal conductance, WUE: water use efficiency, STI: shade tolerance index. (\*\*) Average of three replicates; different lower case letters on the right of each value in both columns of each variable indicate a significant difference between genotypes and shade level, (Scott & Knott test, ( $P \leq 0.05$ )). (\*\*\*) Average of 58 genotypes; different capital letters on the right of each value in line of each variable indicate a significant difference between shade level (Scott & Knott test,  $P \leq 0.05$ ). PWC: wild cacao from river basins of Peruvian Amazon collection (n=14), PFC: Peruvian farmers' collection (n=15), BCC: Brazilian cacao collection (n=14), NIC: national and international cacao collection (n=15). Different lower case letters in parenthesis on the right of each value in both columns of each variable indicate a significant difference between genotypes and shade level, (Scott & Knott test, ( $P \leq 0.05$ )).

**Table S3.** Mean concentrations of macronutrients (g kg<sup>-1</sup>) in shoots of 58 cacao genotypes subjected to two levels of shade (50 and 80%).

| Genotype     | N                  |           | K         |           | Ca        |           | Mg       |          | P        |          |
|--------------|--------------------|-----------|-----------|-----------|-----------|-----------|----------|----------|----------|----------|
|              | g kg <sup>-1</sup> |           |           |           |           |           |          |          |          |          |
|              | 50%                | 80%       | 50%       | 80%       | 50%       | 80%       | 50%      | 80%      | 50%      | 80%      |
| PWC          |                    |           |           |           |           |           |          |          |          |          |
| AYP-15       | 17.44 b*           | 20.77 a   | 29.40 a   | 23.16 b   | 16.03 c   | 18.51 b   | 5.93 b   | 6.35 b   | 1.77 a   | 0.81 d   |
| AYP-20       | 18.45 b            | 22.83 a   | 30.40 a   | 21.62 b   | 10.67 f   | 16.96 c   | 6.03 b   | 6.47 b   | 0.90 d   | 0.69 e   |
| AYP-22       | 11.10 d            | 13.49 c   | 24.47 b   | 22.56 b   | 11.87 e   | 22.72 a   | 5.03 c   | 7.63 a   | 1.10 c   | 0.60 e   |
| PAS-100      | 19.97 a            | 15.77 b   | 27.23 a   | 24.28 b   | 17.37 c   | 18.85 b   | 6.43 b   | 6.57 b   | 1.47 b   | 0.83 d   |
| PAS-105      | 14.80 c            | 16.40 b   | 27.93 a   | 20.96 c   | 16.77 c   | 17.87 b   | 6.77 b   | 5.92 b   | 1.23 b   | 0.81 d   |
| PAS-91       | 18.45 b            | 22.83 a   | 26.47 a   | 20.91 c   | 12.07 e   | 16.20 c   | 6.03 b   | 6.20 b   | 0.87 d   | 0.67 e   |
| PAS-93       | 17.45 b            | 20.95 a   | 19.67 c   | 18.39 c   | 15.70 c   | 17.23 c   | 7.17 a   | 6.35 b   | 1.00 c   | 0.69 e   |
| UGU-112      | 10.83 d            | 23.32 a   | 20.90 c   | 21.71 b   | 9.53 f    | 17.39 c   | 4.43 c   | 6.20 b   | 1.10 c   | 0.81 d   |
| UGU-126      | 11.81 d            | 11.09 d   | 28.63 a   | 22.70 b   | 13.27 e   | 16.80 c   | 6.20 b   | 5.74 b   | 1.10 c   | 0.78 d   |
| UGU-130      | 11.88 d            | 18.10 b   | 26.00 a   | 21.03 c   | 16.37 c   | 15.10 d   | 5.61 b   | 6.60 b   | 1.10 c   | 0.67 e   |
| UNG-53       | 17.48 b            | 21.64 a   | 29.90 a   | 23.11 b   | 16.10 c   | 20.77 a   | 7.30 a   | 7.50 a   | 1.10 c   | 0.63 e   |
| UNG-73       | 16.65 b            | 20.60 a   | 18.57 c   | 19.72 c   | 8.93 g    | 14.99 d   | 4.30 c   | 5.76 b   | 0.72 d   | 0.80 d   |
| UNG-76       | 10.56 d            | 16.42 b   | 19.80 c   | 23.19 b   | 16.33 c   | 15.74 c   | 6.03 b   | 5.72 b   | 1.33 b   | 0.78 d   |
| UNG-77       | 17.86 b            | 22.10 a   | 29.60 a   | 22.16 b   | 12.37 e   | 15.47 d   | 6.00 b   | 6.59 b   | 1.40 b   | 0.83 d   |
| PFC          |                    |           |           |           |           |           |          |          |          |          |
| ICT-1026     | 20.60 a            | 23.06 a   | 20.90 c   | 23.54 b   | 5.17 h    | 16.95 c   | 2.23 d   | 6.71 b   | 1.33 b   | 0.75 d   |
| ICT-1087     | 17.39 b            | 21.52 a   | 19.43 c   | 26.79 a   | 4.43 h    | 16.44 c   | 1.87 d   | 6.81 b   | 1.30 b   | 0.83 d   |
| ICT-1092     | 14.24 c            | 17.63 b   | 21.70 b   | 22.14 b   | 4.20 h    | 17.47 c   | 2.10 d   | 7.84 a   | 1.17 c   | 0.77 d   |
| ICT-1112     | 18.85 b            | 23.79 a   | 20.17 c   | 22.87 b   | 4.47 h    | 17.61 c   | 1.97 d   | 8.65 a   | 1.43 b   | 0.78 d   |
| ICT-1189     | 18.03 b            | 22.31 a   | 18.83 c   | 24.27 b   | 14.87 d   | 16.59 c   | 5.50 b   | 6.21 b   | 1.27 b   | 0.84 d   |
| ICT-1251     | 17.46 b            | 21.61 a   | 21.50 b   | 26.06 a   | 5.00 h    | 18.81 b   | 2.23 d   | 6.25 b   | 1.10 c   | 0.75 d   |
| ICT-1281     | 18.86 b            | 27.12 a   | 19.83 c   | 24.87 b   | 13.17 e   | 16.67 c   | 6.07 b   | 6.69 b   | 1.00 c   | 0.99 c   |
| ICT-1292     | 18.62 b            | 23.05 a   | 21.50 b   | 26.89 a   | 4.87 h    | 18.89 b   | 2.43 d   | 7.70 a   | 1.30 b   | 0.84 d   |
| ICT-1506     | 14.55 c            | 18.01 b   | 21.87 b   | 26.66 a   | 4.47 h    | 18.45 b   | 2.07 d   | 7.43 a   | 1.17 c   | 0.88 d   |
| ICT-2142     | 18.18 b            | 22.35 a   | 21.90 b   | 22.37 b   | 12.87 e   | 17.13 c   | 6.77 b   | 6.76 b   | 1.10 c   | 0.81 d   |
| ICT-2161     | 16.53 b            | 20.46 a   | 21.47 b   | 20.87 c   | 12.10 e   | 16.01 c   | 6.23 b   | 7.10 a   | 0.77 d   | 0.57 e   |
| ICT-2171     | 18.76 b            | 23.57 a   | 21.10 c   | 23.97 b   | 4.77 h    | 19.61 b   | 2.17 d   | 8.23 a   | 1.18 c   | 0.81 d   |
| ICT-2172     | 17.41 b            | 22.30 a   | 23.57 b   | 27.92 a   | 5.13 h    | 18.77 b   | 2.33 d   | 7.58 a   | 1.37 b   | 0.77 d   |
| ICT-2173     | 19.40 b            | 24.00 a   | 22.03 b   | 26.74 a   | 14.03 d   | 16.42 c   | 6.47 b   | 7.10 a   | 1.30 b   | 0.96 c   |
| ICT-2653     | 18.77 b            | 23.22 a   | 21.73 b   | 23.96 b   | 7.60 g    | 19.28 b   | 2.00 d   | 6.90 a   | 0.83 d   | 0.61 e   |
| BCC          |                    |           |           |           |           |           |          |          |          |          |
| BN-34        | 22.59 a            | 23.83 a   | 22.10 b   | 24.55 b   | 12.70 e   | 19.1 b    | 5.70 b   | 7.41 a   | 1.03 c   | 0.68 e   |
| BS-01        | 18.86 b            | 22.92 a   | 22.70 b   | 20.12 c   | 15.23 d   | 19.65 b   | 6.23 b   | 9.72 a   | 0.97 c   | 0.30 e   |
| CA-14        | 17.86 b            | 22.11 a   | 23.17 b   | 24.34 b   | 13.10 e   | 15.88 c   | 5.27 b   | 6.87 a   | 1.00 c   | 0.69 e   |
| CEPEC-2002   | 18.38 b            | 22.12 a   | 26.07 a   | 23.59 b   | 11.77 e   | 22.82 a   | 5.43 b   | 8.12 a   | 1.07 c   | 0.53 e   |
| CP-49-C10    | 18.86 b            | 23.29 a   | 21.53 b   | 20.78 c   | 12.90 e   | 18.92 b   | 5.77 b   | 8.03 a   | 0.77 d   | 0.49 e   |
| CP-53-C10    | 19.72 a            | 24.40 a   | 21.63 b   | 25.03 b   | 12.53 e   | 18.85 b   | 5.60 b   | 7.74 a   | 0.97 c   | 0.60 e   |
| IPIRANGA-1   | 17.18 b            | 21.26 a   | 22.37 b   | 22.59 b   | 10.70 f   | 16.49 c   | 5.40 b   | 6.94 a   | 0.94 d   | 0.42 e   |
| PH-09        | 17.94 b            | 21.95 a   | 22.37 b   | 19.06 c   | 11.33 f   | 20.99 a   | 5.67 b   | 7.47 a   | 1.08 c   | 0.53 e   |
| PH-144       | 20.06 a            | 24.83 a   | 21.97 b   | 20.57 c   | 13.27 e   | 18.32 b   | 5.83 b   | 7.34 a   | 0.97 c   | 0.60 e   |
| PH-15        | 17.97 b            | 22.72 a   | 26.05 a   | 21.33 b   | 12.75 e   | 17.57 c   | 5.75 b   | 7.12 a   | 0.95 c   | 0.62 e   |
| PH-16        | 18.45 b            | 22.83 a   | 20.53 c   | 19.10 c   | 14.40 d   | 21.81 a   | 6.30 b   | 7.70 a   | 1.30 b   | 0.50 e   |
| PH-17        | 17.22 b            | 21.28 a   | 22.67 b   | 19.54 c   | 13.87 d   | 18.77 b   | 5.77 b   | 7.42 a   | 0.70 d   | 0.48 e   |
| PH-21        | 18.28 b            | 23.93 a   | 23.97 b   | 17.54 c   | 11.70 e   | 19.16 b   | 5.57 b   | 7.74 a   | 0.93 d   | 0.55 e   |
| PH-990       | 18.35 b            | 28.83 a   | 24.87 b   | 23.12 b   | 10.93 f   | 18.73 b   | 4.46 c   | 7.72 a   | 0.83 d   | 0.63 e   |
| NIC          |                    |           |           |           |           |           |          |          |          |          |
| CCN-10       | 17.63 b            | 21.81 a   | 12.37 d   | 17.19 c   | 7.23 g    | 14.28 d   | 4.03 c   | 4.69 c   | 0.63 e   | 0.84 d   |
| CCN-51       | 18.73 b            | 23.18 a   | 13.87 d   | 17.81 c   | 8.33 g    | 12.53 e   | 3.80 c   | 4.92 c   | 1.10 c   | 0.80 d   |
| EET-400      | 17.64 b            | 21.83 a   | 24.93 b   | 19.81 c   | 15.13 d   | 18.46 b   | 7.93 a   | 6.60 b   | 0.93 d   | 0.78 d   |
| H-10         | 14.97 c            | 18.52 b   | 12.20 d   | 18.98 c   | 6.70 g    | 17.51 c   | 3.70 c   | 6.42 b   | 0.25 e   | 0.62 e   |
| ICS-1        | 18.04 b            | 26.54 a   | 13.43 d   | 16.44 d   | 7.57 g    | 12.36 e   | 3.50 c   | 5.72 b   | 1.10 c   | 0.89 d   |
| ICS-39       | 17.24 b            | 21.33 a   | 17.70 c   | 19.68 c   | 10.47 f   | 15.39 d   | 4.06 c   | 6.18 b   | 0.63 e   | 0.91 d   |
| ICS-6        | 15.22 c            | 21.20 a   | 26.03 a   | 21.18 c   | 13.23 e   | 15.75 c   | 7.43 a   | 6.35 b   | 0.97 c   | 0.83 d   |
| ICS-95       | 17.54 b            | 21.71 a   | 24.13 b   | 18.97 c   | 13.43 e   | 13.72 d   | 7.13 a   | 4.66 c   | 0.93 d   | 0.90 d   |
| IMC-67       | 18.26 b            | 22.60 a   | 16.46 d   | 22.13 b   | 9.33 f    | 17.68 b   | 5.42 b   | 6.95 a   | 1.45 b   | 0.72 d   |
| POUND-12     | 17.60 b            | 21.82 a   | 22.35 b   | 19.63 c   | 14.35 d   | 14.88 d   | 6.70 b   | 5.97 b   | 0.80 d   | 0.84 d   |
| SCA-6        | 16.17 b            | 20.01 a   | 13.17 d   | 18.25 c   | 8.43 g    | 16.87 c   | 4.87 c   | 6.37 b   | 0.60 e   | 0.72 d   |
| TSH-1188     | 17.27 b            | 21.37 a   | 24.70 b   | 14.72 d   | 12.9 e    | 11.86 e   | 7.33 a   | 4.64 c   | 0.87 d   | 0.89 d   |
| TSH-565      | 16.83 b            | 20.82 a   | 23.40 b   | 16.27 d   | 14.70 d   | 14.66 d   | 7.73 a   | 5.11 b   | 0.97 c   | 0.77 d   |
| UF-613       | 18.26 b            | 22.59 a   | 13.60 d   | 17.22 c   | 9.20 f    | 16.55 c   | 4.20 c   | 6.39 b   | 1.20 c   | 0.98 c   |
| UF-667       | 16.64 b            | 20.61 a   | 23.53 b   | 19.73 c   | 14.10 d   | 14.67 d   | 7.90 a   | 5.61 b   | 0.83 d   | 0.96 c   |
| Media PWC    | 15.09 (d)          | 19.02 (b) | 25.64 (a) | 21.82 (c) | 13.81 (d) | 17.47 (b) | 6.02 (c) | 6.40 (b) | 1.18 (a) | 0.74 (c) |
| Media PFC    | 17.45 (c)          | 21.78 (a) | 21.17 (c) | 24.66 (a) | 7.81 (f)  | 17.67 (b) | 3.60 (d) | 7.20 (a) | 1.14 (a) | 0.80 (c) |
| Media BCC    | 18.26 (b)          | 22.53 (a) | 23.00 (b) | 21.52 (c) | 12.66 (d) | 19.08 (a) | 5.69 (c) | 7.52 (a) | 0.93 (b) | 0.54 (d) |
| Media NIC    | 17.20 (c)          | 21.45 (a) | 18.79 (d) | 18.53 (d) | 11.01 (e) | 15.14 (c) | 5.78 (c) | 5.69 (c) | 0.87 (b) | 0.83 (c) |
| Media Total  | 17.01 B**          | 21.21 A   | 22.08 B   | 21.63 A   | 11.26 B   | 17.31 A   | 5.25 B   | 6.69 A   | 1.03 A   | 0.73 B   |
| S. variation | df                 | pv        |           |           |           |           |          |          |          |          |
| Shade (S)    | 1                  | <0.0001   |           | 0.1034    |           | <0.0001   |          | <0.0001  |          | 0.0002   |
| Genotype (G) | 57                 | <0.0001   |           | <0.0001   |           | <0.0001   |          | <0.0001  |          | <0.0001  |
| G*S          | 57                 | 0.002     |           | <0.0001   |           | <0.0001   |          | <0.0001  |          | <0.0001  |

(\*) Average of three replicates, different lower case letters on the right of each value in both columns of each variable indicate a significant difference between genotypes and shade level, (Scott & Knott test, ( $P < 0.05$ )). (\*\*) Average of 58 genotypes, different capital letters on the right of each value in line of each variable indicate a significant difference between shade level (Scott & Knott test, ( $P < 0.05$ )). PWC: wild cacao from river basins of Peruvian Amazon collection, PFC: Peruvian farmers' collection, BCC: Brazilian cacao collection, NIC: National and International cacao collection. Different lower case letters in parenthesis on the right of each value in both columns of each variable indicate a significant difference between genotypes and shade level, (Scott & Knott test, ( $P < 0.05$ )).

**Table S4.** Mean concentration of micronutrients (mg kg<sup>-1</sup>) in shoots of 58 cacao genotypes subjected to two levels of shade (50 and 80%).

| Genotype            | Fe                  |                 | Zn             |                | Mn             |                | Cu            |                |
|---------------------|---------------------|-----------------|----------------|----------------|----------------|----------------|---------------|----------------|
|                     | mg kg <sup>-1</sup> |                 |                |                |                |                |               |                |
|                     | 50%                 | 80%             | 50%            | 80%            | 50%            | 80%            | 50%           | 80%            |
| <b>PWC</b>          |                     |                 |                |                |                |                |               |                |
| AYP-15              | 247.80 b*           | 259.18 b        | 46.57 b        | 42.23 c        | 84.29 b        | 63.46 c        | 4.42 c        | 8.89 c         |
| AYP-20              | 169.84 c            | 278.63 a        | 31.88 d        | 45.01 c        | 54.25 c        | 84.93 b        | 6.74 c        | 9.35 c         |
| AYP-22              | 187.13 c            | 222.38 b        | 33.66 d        | 76.39 a        | 28.37 d        | 84.18 b        | 6.88 c        | 16.50 b        |
| PAS-100             | 275.73 a            | 225.13 b        | 43.36 c        | 50.00 b        | 70.38 b        | 100.18 b       | 9.54 c        | 7.50 c         |
| PAS-105             | 151.18 c            | 239.34 b        | 43.24 c        | 55.80 b        | 49.54 c        | 131.91 a       | 8.09 c        | 12.92 b        |
| PAS-91              | 149.98 c            | 225.64 b        | 41.47 c        | 47.31 b        | 53.07 c        | 115.15 a       | 5.09 c        | 6.54 c         |
| PAS-93              | 122.26 d            | 225.84 b        | 38.96 c        | 47.19 b        | 65.03 c        | 75.48 b        | 6.65 c        | 14.33 b        |
| UGU-112             | 131.94 d            | 226.99 b        | 32.82 d        | 50.12 b        | 22.63 d        | 64.79 c        | 6.01 c        | 4.92 c         |
| UGU-126             | 168.27 c            | 245.70 b        | 39.73 c        | 42.50 c        | 46.85 c        | 80.83 b        | 5.17 c        | 6.78 c         |
| UGU-130             | 166.49 c            | 225.14 b        | 47.72 b        | 47.03 b        | 55.25 c        | 78.62 b        | 7.77 c        | 6.47 c         |
| UNG-53              | 177.41 c            | 182.02 c        | 44.73 c        | 42.59 c        | 58.87 c        | 50.23 c        | 9.44 c        | 9.13 c         |
| UNG-73              | 107.39 d            | 260.63 b        | 31.31 d        | 41.17 c        | 18.52 d        | 79.68 b        | 6.84 c        | 7.77 c         |
| UNG-76              | 120.68 d            | 303.51 a        | 42.18 c        | 41.53 c        | 40.11 d        | 77.83 b        | 8.06 c        | 5.95 c         |
| UNG-77              | 247.09 b            | 241.41 b        | 47.89 b        | 41.85 c        | 61.22 c        | 90.83 b        | 7.89 c        | 14.99 b        |
| <b>PFC</b>          |                     |                 |                |                |                |                |               |                |
| ICT-1026            | 98.48 d             | 176.44 c        | 35.25 d        | 48.75 b        | 58.83 c        | 50.67 c        | 9.66 c        | 24.26 a        |
| ICT-1087            | 109.82 d            | 173.16 c        | 26.16 d        | 41.61 c        | 47.81 c        | 82.21 b        | 9.80 c        | 16.01 b        |
| ICT-1092            | 80.33 d             | 185.94 c        | 30.58 d        | 50.88 b        | 50.24 c        | 105.24 a       | 5.87 c        | 10.70 c        |
| ICT-1112            | 84.37 d             | 141.48 d        | 40.87 c        | 44.44 c        | 28.94 d        | 54.33 c        | 6.64 c        | 8.38 c         |
| ICT-1189            | 72.04 d             | 142.24 d        | 26.86 d        | 42.41 c        | 52.35 c        | 62.81 c        | 5.32 c        | 8.69 c         |
| ICT-1251            | 177.47 c            | 135.31 d        | 45.55 c        | 51.08 b        | 63.69 c        | 92.37 b        | 6.56 c        | 8.21 c         |
| ICT-1281            | 109.77 d            | 134.68 d        | 29.39 d        | 45.75 c        | 42.80 c        | 67.15 c        | 5.02 c        | 10.97 c        |
| ICT-1292            | 127.43 d            | 155.29 c        | 30.19 d        | 47.28 b        | 43.96 c        | 62.06 c        | 6.75 c        | 16.72 b        |
| ICT-1506            | 133.08 d            | 151.98 c        | 37.90 c        | 44.51 c        | 40.41 d        | 74.93 b        | 7.90 c        | 9.44 c         |
| ICT-2142            | 127.25 d            | 156.95 c        | 25.04 d        | 39.70 c        | 39.12 d        | 50.95 c        | 7.61 c        | 16.54 b        |
| ICT-2161            | 112.34 d            | 138.54 d        | 22.86 d        | 46.56 b        | 31.96 d        | 81.67 b        | 9.06 c        | 9.38 c         |
| ICT-2171            | 123.40 d            | 188.00 c        | 42.32 c        | 50.65 b        | 45.54 c        | 81.72 b        | 8.18 c        | 19.50 b        |
| ICT-2172            | 92.32 d             | 162.03 c        | 33.01 d        | 45.42 c        | 36.20 d        | 70.56 b        | 8.39 c        | 9.03 c         |
| ICT-2173            | 110.90 d            | 131.38 d        | 27.19 d        | 48.07 b        | 47.83 c        | 74.68 b        | 8.72 c        | 9.02 c         |
| ICT-2653            | 100.76 d            | 168.58 c        | 30.75 d        | 52.14 b        | 41.33 d        | 81.71 b        | 6.85 c        | 9.49 c         |
| <b>BCC</b>          |                     |                 |                |                |                |                |               |                |
| BN-34               | 108.44 d            | 207.65 b        | 29.92 d        | 38.60 c        | 31.76 d        | 72.46 b        | 5.19 c        | 9.42 c         |
| BS-01               | 258.90 b            | 205.16 b        | 24.13 d        | 40.69 c        | 34.11 d        | 57.58 c        | 4.41 c        | 5.84 c         |
| CA-14               | 126.32 d            | 155.77 c        | 26.11 d        | 38.29 c        | 18.42 d        | 52.78 c        | 5.17 c        | 7.01 c         |
| CEPEC-2002          | 159.11 c            | 119.81 d        | 38.74 c        | 49.70 b        | 21.80 d        | 34.36 d        | 6.04 c        | 9.20 c         |
| CP-49-C10           | 97.20 d             | 141.37 d        | 22.02 d        | 48.66 b        | 33.31 d        | 38.69 d        | 4.13 c        | 7.74 c         |
| CP-53-C10           | 345.71 a            | 179.01 c        | 21.64 d        | 46.34 b        | 38.32 d        | 78.28 b        | 5.72 c        | 9.93 c         |
| IPIRANGA-1          | 121.31 d            | 234.17 b        | 21.06 d        | 44.22 c        | 25.86 d        | 95.32 b        | 5.45 c        | 7.17 c         |
| PH-09               | 213.20 b            | 171.92 c        | 25.17 d        | 43.18 c        | 26.35 d        | 122.81 a       | 6.11 c        | 9.18 c         |
| PH-144              | 243.08 b            | 189.39 c        | 23.46 d        | 41.19 c        | 32.13 d        | 56.63 c        | 4.48 c        | 5.20 c         |
| PH-15               | 116.92 d            | 198.69 b        | 27.91 d        | 40.08 c        | 21.31 d        | 48.97 c        | 6.78 c        | 7.81 c         |
| PH-16               | 329.32 a            | 211.58 b        | 21.59 d        | 53.52 b        | 30.70 d        | 147.17 a       | 6.02 c        | 7.29 c         |
| PH-17               | 135.13 d            | 156.04 c        | 34.53 d        | 60.42 b        | 49.64 c        | 155.58 a       | 6.77 c        | 13.69 b        |
| PH-21               | 194.97 b            | 200.87 b        | 29.07 d        | 36.85 c        | 22.05 d        | 52.47 c        | 6.30 c        | 6.82 c         |
| PH-990              | 274.37 a            | 167.23 c        | 43.07 c        | 41.27 c        | 24.12 d        | 64.56 c        | 7.39 c        | 10.27 c        |
| <b>NIC</b>          |                     |                 |                |                |                |                |               |                |
| CCN-10              | 262.12 b            | 205.56 b        | 43.74 c        | 43.83 c        | 84.95 b        | 101.23 b       | 9.07 c        | 12.96 b        |
| CCN-51              | 261.34 b            | 230.53 b        | 26.89 d        | 37.04 c        | 21.36 d        | 88.85 b        | 9.78 c        | 12.86 b        |
| EET-400             | 239.43 b            | 256.67 b        | 44.05 c        | 55.18 b        | 82.36 b        | 73.81 b        | 15.63 b       | 15.86 b        |
| H-10                | 122.26 d            | 152.02 c        | 44.78 c        | 39.49 c        | 27.82 d        | 65.85 c        | 8.38 c        | 17.54 b        |
| ICS-1               | 199.54 b            | 183.69 c        | 34.11 d        | 37.63 c        | 21.10 d        | 103.17 b       | 9.71 c        | 11.77 c        |
| ICS-39              | 140.60 d            | 167.99 c        | 45.35 c        | 45.45 c        | 74.68 b        | 109.90 a       | 10.9 c        | 9.02 c         |
| ICS-6               | 165.72 c            | 206.67 b        | 36.59 c        | 40.83 c        | 55.47 c        | 75.83 b        | 12.58 b       | 15.83 b        |
| ICS-95              | 198.72 b            | 205.77 b        | 41.87 c        | 42.48 c        | 78.05 b        | 126.84 a       | 18.79 b       | 29.92 a        |
| IMC-67              | 247.17 b            | 203.83 b        | 38.20 c        | 44.21 c        | 26.75 d        | 79.31 b        | 9.43 c        | 12.93 b        |
| POUND-12            | 184.32 c            | 183.17 c        | 41.13 c        | 41.83 c        | 59.54 c        | 64.34 c        | 7.64 c        | 7.23 c         |
| SCA-6               | 134.50 d            | 219.24 b        | 40.45 c        | 44.61 c        | 70.05 b        | 66.24 c        | 11.68 c       | 20.08 b        |
| TSH-1188            | 189.65 c            | 226.59 b        | 38.94 c        | 46.50 b        | 54.22 c        | 115.98 a       | 7.16 c        | 8.87 c         |
| TSH-565             | 236.09 b            | 213.47 b        | 36.34 c        | 47.32 b        | 83.48 b        | 76.51 b        | 8.08 c        | 12.44 b        |
| UF-613              | 174.97 c            | 229.17 b        | 37.61 c        | 43.42 c        | 18.86 d        | 93.03 b        | 14.56 b       | 14.16 b        |
| UF-667              | 286.85 a            | 388.64 a        | 38.00 c        | 37.94 c        | 100.10 b       | 82.76 b        | 9.44 c        | 10.78 c        |
| Media PWC           | 173.09 (b)          | 240.11 (a)      | 40.39 (c)      | 47.91 (a)      | 50.60 (b)      | 84.15 (a)      | 7.04 (d)      | 9.43 (c)       |
| Media PFC           | 110.65 (d)          | 156.13 (c)      | 32.26 (d)      | 46.62 (a)      | 44.73 (b)      | 72.87 (a)      | 7.49 (d)      | 12.42 (b)      |
| Media BCC           | 194.57 (b)          | 181.33 (b)      | 27.74 (e)      | 44.50 (b)      | 29.28 (c)      | 76.98 (a)      | 5.71 (d)      | 8.33 (c)       |
| Media NIC           | 202.88 (b)          | 218.20 (a)      | 39.20 (c)      | 43.18 (b)      | 57.25 (b)      | 88.24 (a)      | 10.85 (b)     | 14.15 (a)      |
| <b>Media Total</b>  | <b>169.83 B**</b>   | <b>198.54 A</b> | <b>34.93 B</b> | <b>45.53 A</b> | <b>45.66 B</b> | <b>80.56 A</b> | <b>7.82 B</b> | <b>11.16 A</b> |
| <i>S. variation</i> | <i>df</i>           | <i>pv</i>       |                |                |                |                |               |                |
| Shade (S)           | 1                   | 0.0017          | <0.0001        |                | 0.0006         |                | <0.0001       |                |
| Genotype (G)        | 57                  | <0.0001         | <0.0001        |                | <0.0001        |                | <0.0001       |                |
| G*S                 | 57                  | <0.0001         | <0.0001        |                | <0.0001        |                | 0.0017        |                |

(\*) Average of three replicates, different lower case letters on the right of each value in both columns of each variable indicate a significant difference between genotypes and shade level, (Scott & Knott test, ( $P < 0.05$ )). (\*\*) Average of 58 genotypes, different capital letters on the right of each value in line of each variable indicate a significant difference between shade level (Scott & Knott test, ( $P < 0.05$ )). PWC: wild cacao from river basins of Peruvian Amazon collection, PFC: Peruvian farmers' collection, BCC: Brazilian cacao collection, NIC: National and International cacao collection. Different lower case letters in parenthesis on the right of each value in both columns of each variable indicate a significant difference between genotypes and shade level, (Scott & Knott test, ( $P < 0.05$ )).
